# Supplementary material for: Determination of the Concentration of Silver Atoms in Hydrosol Nanoparticles
Source: MDPI journal article supplement (doi:10.3390/nano12183091), 2022-09-06
Supplement: s1 [file s1]

# Determination of the Concentration of Silver Atoms in Hydrosol Nanoparticles

Evgeny Abkhalimov \*, Vadim Ershov and Boris Ershov

Frumkin Institute of Physical Chemistry and Electrochemistry, Russian Academy of Science,  
Leninsky pr. 31-4, 119071 Moscow, Russia

\* Correspondence: abkhalimov@ipc.rssi.ru

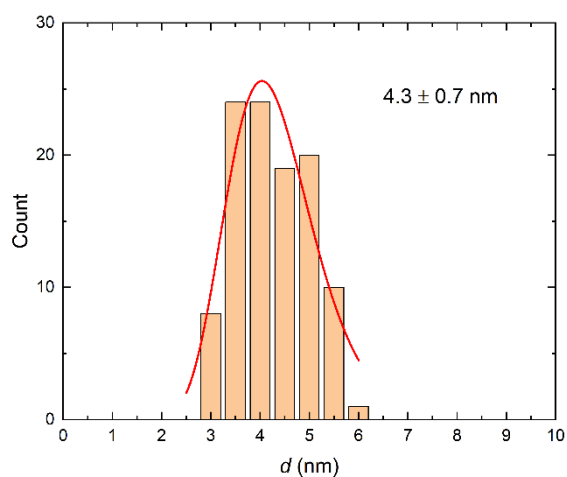

**Figure S1.** Size distribution of Pp silver NPs.

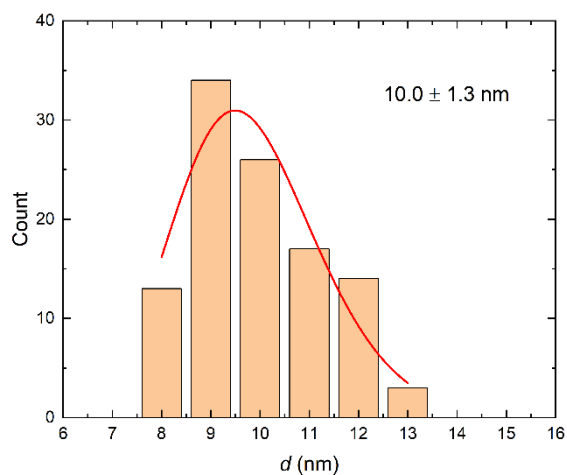

**Figure S2.** Size distribution of carbonate silver NPs.

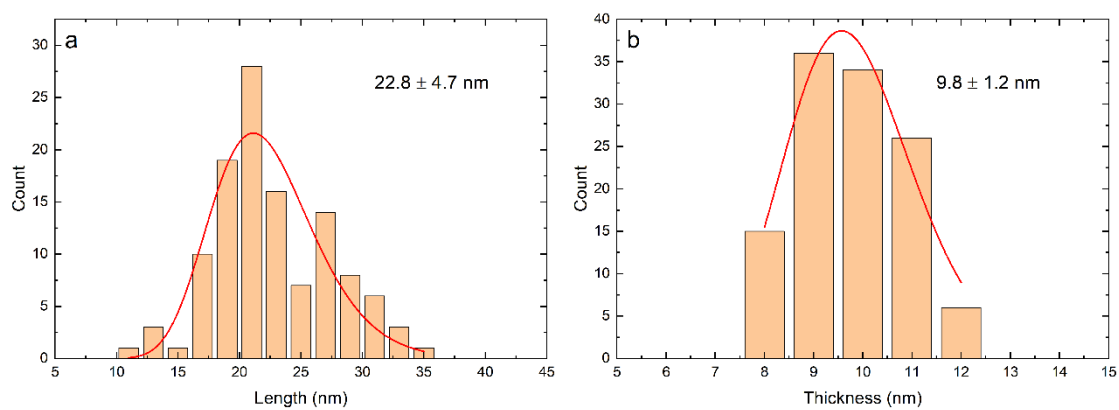

**Figure S3.** Size distribution of silver nanoplates.

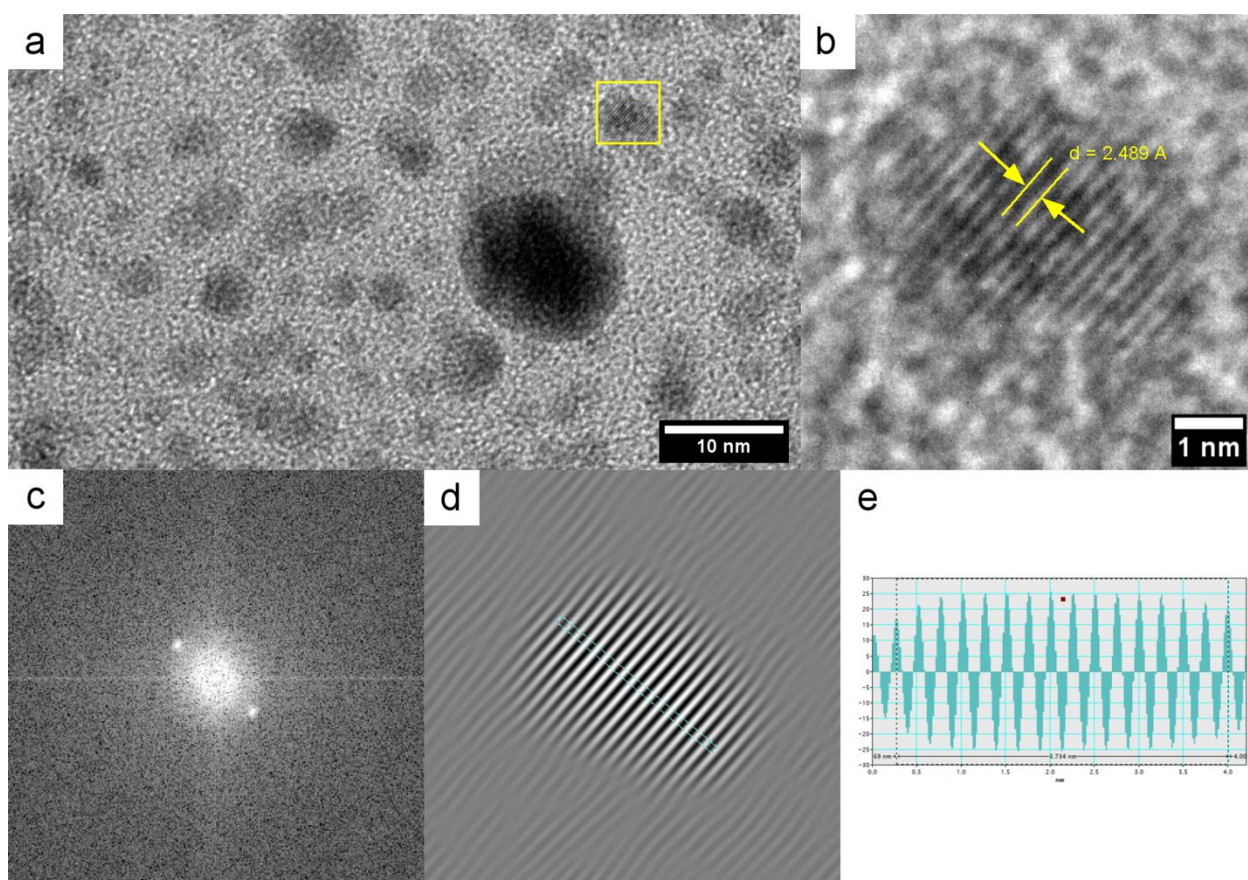

**Figure S4.** TEM (a) and HRTEM (b) images of polyphosphate NPs; (c) FFT images of the area highlighted by the square in 4a (c); Lattice fringes obtained from 4c by inverse FFT (d); Profile of d-spacing of the area highlighted in 4d (e)

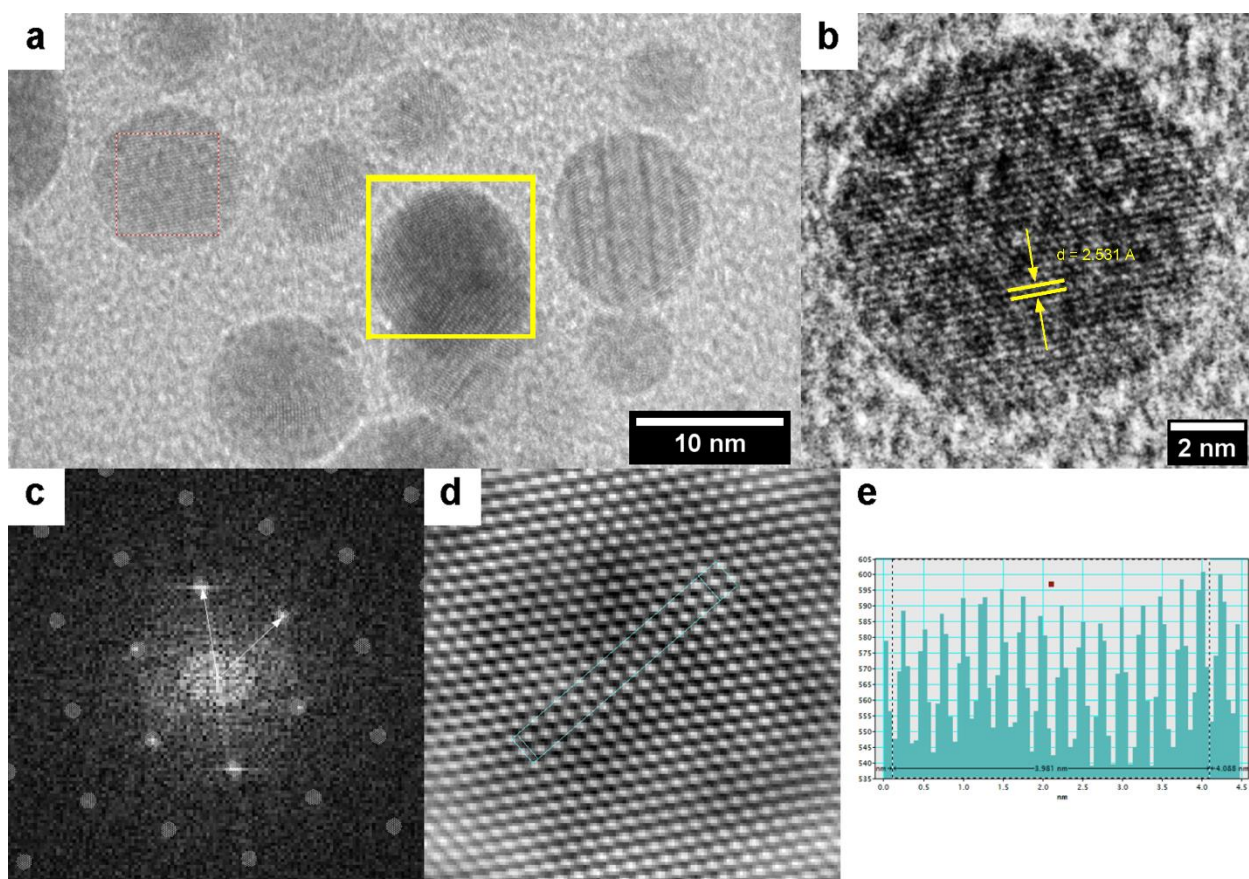

**Figure S5.** TEM (a) and HRTEM (b) images of carbonate NPs; (c) FFT images of the area highlighted by the square in 5a (c); Lattice fringes obtained from 5c by inverse FFT (d); Profile of d-spacing of the area highlighted in 5d (e).

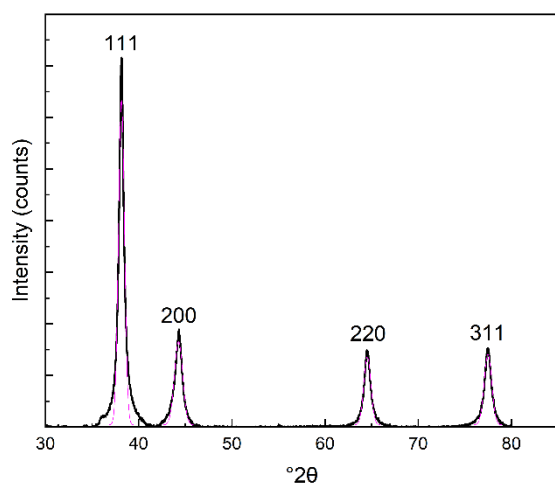

**Figure S6.** XRD pattern of carbonate NPs.
